# Supplementary material for: Spectral and redox properties of zinc porphyrin core dendrimers with triarylamines as dendron
Source: Royal Society of Chemistry journal article supplement (doi:10.1039/c0dt00199f), 2010-01-01
Supplement: c0dt00199f.pdf [file c0dt00199f.pdf]

Supplementary Information for  
**“Spectral and Redox Properties of Zinc Porphyrin Core Dendrimers with Triarylamines as Dendron”**

Chih-Yen Huang,<sup>a</sup> Yuhlong Oliver Su<sup>\*a,b</sup>

<sup>a</sup> Department of Applied Chemistry, National Chi Nan University, Nantou 545 Taiwan.

<sup>b</sup> Department of Chemistry, National Chung Hsing University, Taichung, 402 Taiwan.

E-mail : yosu@ncnu.edu.tw

Contents :

- A. <sup>1</sup>H NMR spectra
- B. Excitation spectra
- C. Tables of calculated numbers of electron transferred from spectroelectrochemistry

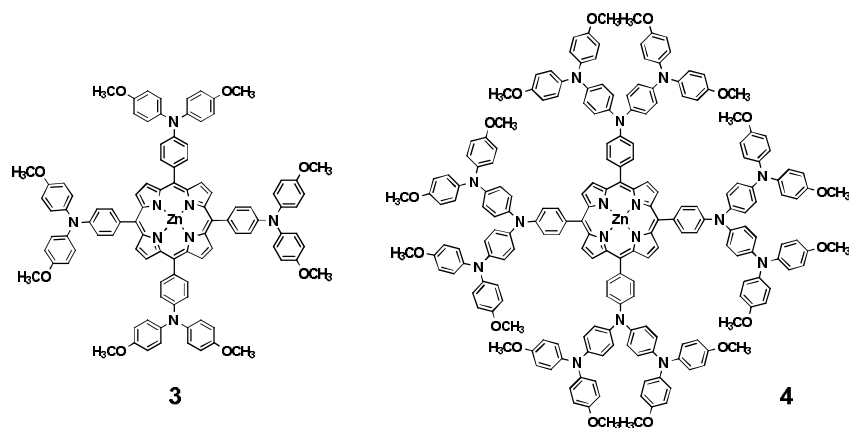

**A : <sup>1</sup>H NMR spectra**

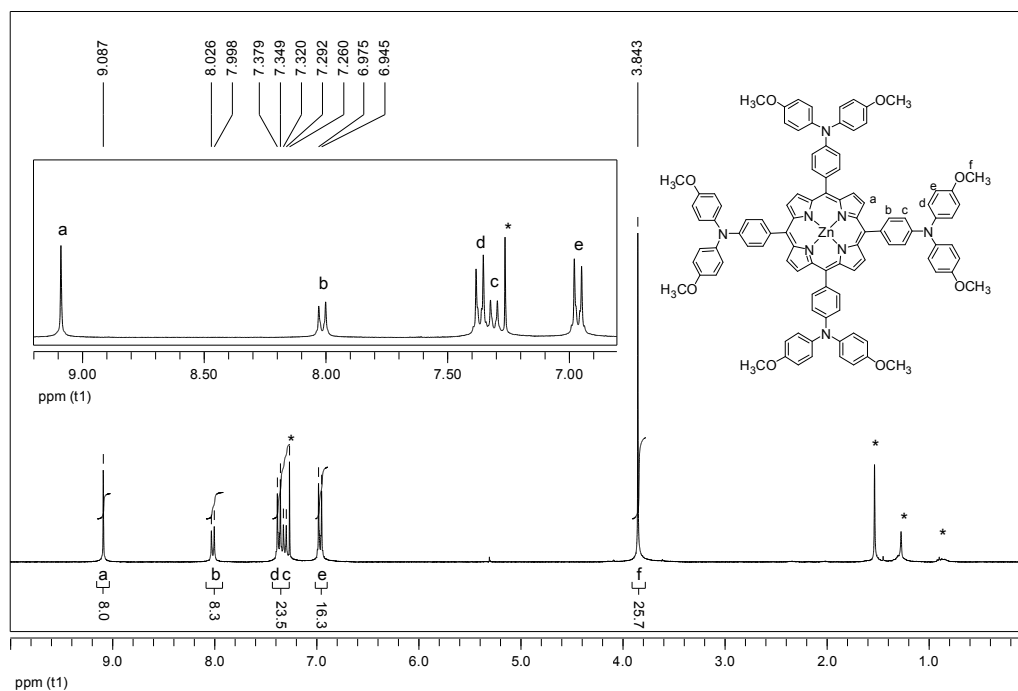

**Fig. 1** <sup>1</sup>H NMR of **3** in CDCl<sub>3</sub>.

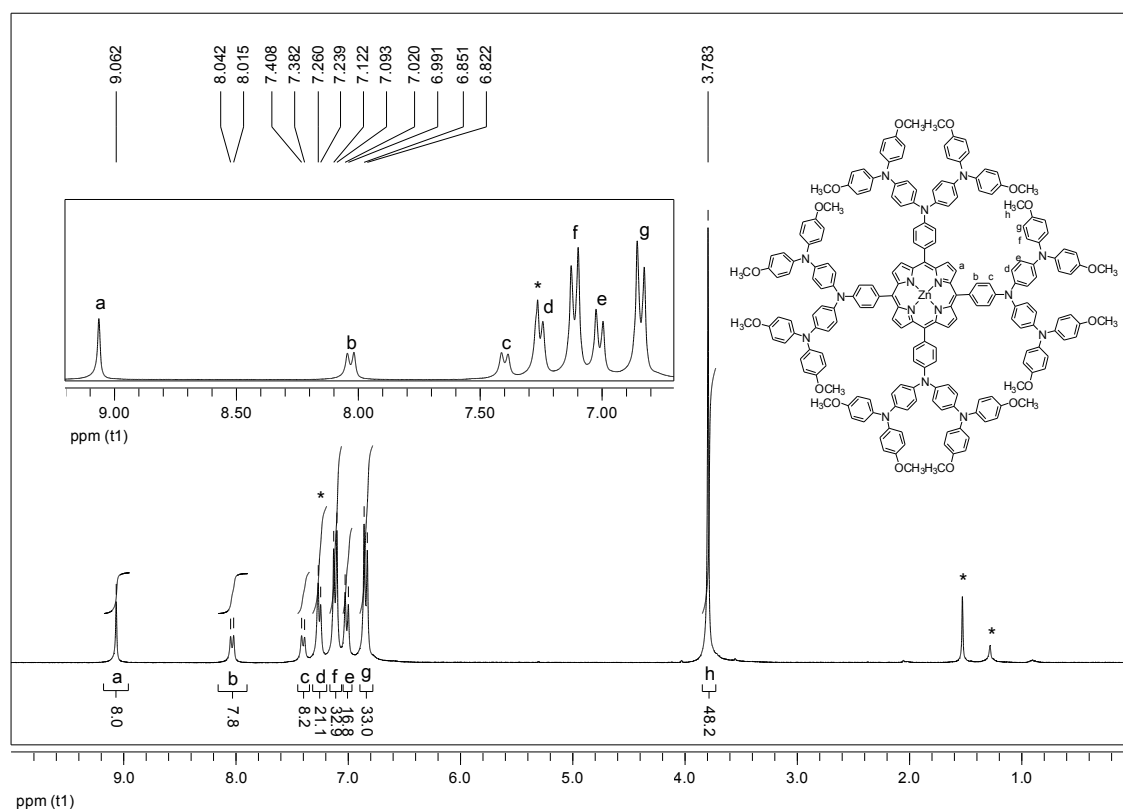

Fig. 2  $^1\text{H}$  NMR of **4** in  $\text{CDCl}_3$ .

## B. Excitation spectra

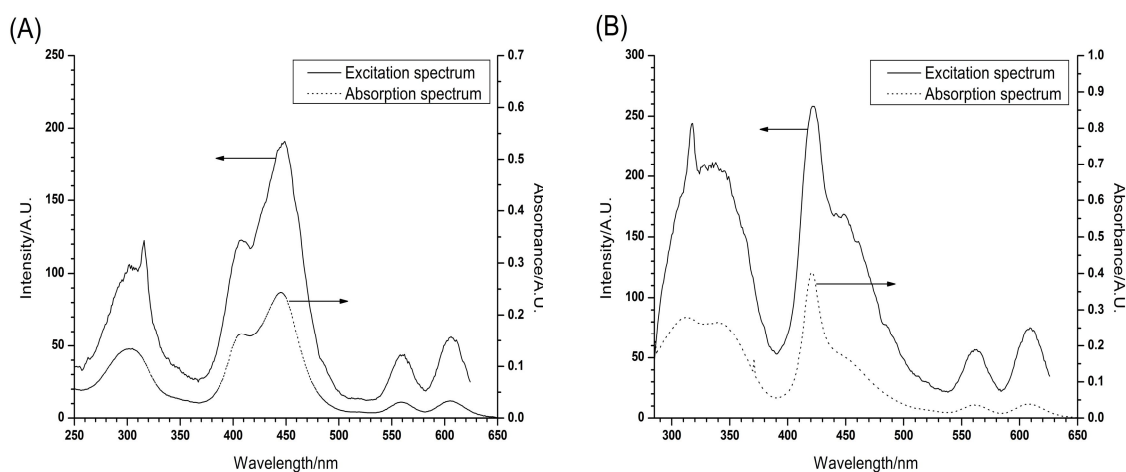

Fig. 3 The absorption and excitation spectra of (A)  $2.5 \times 10^{-5}$  M **3** in  $\text{CH}_2\text{Cl}_2$ ; (B)  $2.0 \times 10^{-6}$  M **4** in toluene. Excitation experiments were monitored at emission wavelength (A) 635; (B) 632 nm.

### C. Tables of calculated numbers of electron transferred from spectroelectrochemistry

**Table 1** The numbers of electron transferred ( $n$ ) in Ox 1 of **4** was obtained from the plot of  $\log[(A_O - A)/(A - A_R)]^a$  vs. applied potential ( $E$ ). Data is obtained from Fig. 6(D) in article.

| Absorption peak (nm) | $E = -\frac{0.059}{n} \log \frac{A_O - A}{A - A_R} + E^0$ | $n$  | R square      |
|----------------------|-----------------------------------------------------------|------|---------------|
| 312                  | $y = -0.061x + 0.423$                                     | 0.97 | $R^2 = 0.993$ |
| 426                  | $y = -0.047x + 0.411$                                     | 1.26 | $R^2 = 0.961$ |
| 552                  | $y = -0.051x + 0.444$                                     | 1.16 | $R^2 = 0.971$ |
| 610                  | $y = -0.056x + 0.407$                                     | 1.05 | $R^2 = 0.914$ |
| 774                  | $y = -0.057x + 0.435$                                     | 1.04 | $R^2 = 0.990$ |
| 1354                 | $y = -0.060x + 0.430$                                     | 0.98 | $R^2 = 0.998$ |

<sup>a</sup>  $A_O$ ,  $A_R$  and  $A$  represent the absorbance of a peak at oxidative state, reductive state and an applied potential respectively.

**Table 2** The numbers of electron transferred ( $n$ ) in Ox 2 of **4** was obtained from the plot of  $\log[(A_O - A)/(A - A_R)]^a$  vs. applied potential ( $E$ ). Data is obtained from Fig. 6(E) in article.

| Absorption peak (nm) | $E = -\frac{0.059}{n} \log \frac{A_O - A}{A - A_R} + E^0$ | $n$  | R square      |
|----------------------|-----------------------------------------------------------|------|---------------|
| 298                  | $y = -0.062x + 0.703$                                     | 0.95 | $R^2 = 0.900$ |
| 426                  | $y = -0.099x + 0.735$                                     | 0.60 | $R^2 = 0.965$ |
| 556                  | $y = -0.060x + 0.721$                                     | 0.98 | $R^2 = 0.981$ |
| 592                  | $y = -0.053x + 0.721$                                     | 1.11 | $R^2 = 0.939$ |
| 1172                 | $y = -0.068x + 0.716$                                     | 0.87 | $R^2 = 0.986$ |
| 1500                 | $y = -0.064x + 0.710$                                     | 0.92 | $R^2 = 0.961$ |

<sup>a</sup>  $A_O$ ,  $A_R$  and  $A$  represent the absorbance of a peak at oxidative state, reductive state and an applied potential respectively.
